# Supplementary material
Source: PubMed Central journal article supplement (PMC2141832)
Supplement: pnas_0704652104_2.pdf [file pnas_0704652104_2.pdf]

**Table 6. Epigenetic and genetic alterations in 97 CRC patients**

| Marker                                                | Chr. location | Function                               | Methylation assay | Mean Methylation level, % | Cases with methylation $\geq 15\%$ , % of total cases |
|-------------------------------------------------------|---------------|----------------------------------------|-------------------|---------------------------|-------------------------------------------------------|
| <b>Classical CIMP markers</b>                         |               |                                        |                   |                           |                                                       |
| MINT1                                                 | 5q13-14       | SV2C, synaptic vesicle glycoprotein 2C | MCA               |                           | 38 (39.2)                                             |
| MINT2                                                 | 2p22-21       | Unknown                                | MCA               |                           | 42 (43.3)                                             |
| MINT27                                                | 10q11.22      | SYT15 (synaptotagmin XV)               | MCA               |                           | 51 (52.6)                                             |
| MINT12                                                | 7q31-32       | Unknown                                | MCA               |                           | 35 (36.1)                                             |
| MINT31                                                | 17q21         | An island 2kb upstream of CACNA1G      | MCA               |                           | 39 (40.2)                                             |
| MINT17                                                | 12q24.22      | HRK (apoptosis regulator)              | MCA               |                           | 28 (28.9)                                             |
| <b>Type-C genes (genes methylated in cancer only)</b> |               |                                        |                   |                           |                                                       |
| p14                                                   | 9p21          | P53 pathway                            | COBRA             | 7.4                       | 21 (21.7)                                             |
| MLH1                                                  | 2p22          | Mismatch repair                        | COBRA             | 8.8                       | 17 (17.5)                                             |
| THBS1                                                 | 15q14         | Angiogenesis inhibitor                 | COBRA             | 2.0                       | 5 (5.2)                                               |
| THBS2                                                 | 6q            | Angiogenesis inhibitor                 | COBRA             | 12.1                      | 37 (38.1)                                             |
| MGMT                                                  | 10q26         | DNA repair                             | COBRA             | 20.6                      | 41 (43.6)                                             |
| COX2                                                  | 1q25.2        | Cyclooxygenase-2                       | COBRA             | 3.3                       | 10 (10.3)                                             |
| Megalin                                               | 1q21.1        | phosphodiesterase 4D interacting       | COBRA             | 11.0                      | 30 (30.9)                                             |
| RIZ1                                                  | 1p36          | Transcription/RB1                      | MSP               | 7.3                       | 14 (14.4)                                             |

| Marker                                                    | Chr. location | Function                            | Methylation assay | Mean Methylation level, % | Cases with methylation $\geq$ 15%, % of total cases |
|-----------------------------------------------------------|---------------|-------------------------------------|-------------------|---------------------------|-----------------------------------------------------|
| p16                                                       | 9p21          | Cell cycle                          | Pyrosequencing    | 11.2                      | 22 (23.7)                                           |
| RASSF1A                                                   | 3p21.31       | RAS association domain family 1A    | Pyrosequencing    | 8.4                       | 16 (17.0)                                           |
| DAPK                                                      | 9p34.1        | Death associated protein kinase     | Pyrosequencing    | 5.0                       | 8 (8.7)                                             |
| TIMP3                                                     | 22q12.1       | Metastasis suppressor               | Pyrosequencing    | 16.8                      | 35 (36.1)                                           |
| hTERT                                                     | 5p15.33       | Telomerase reverse transcriptase    | Pyrosequencing    | 12.9                      | 35 (36.1)                                           |
| Neurog1                                                   | 5q31.1        | Neurogenin 1                        | Pyrosequencing    | 25.3                      | 49 (51.6)                                           |
| SOCS1                                                     | 16p13.13      | Suppressor of cytokine signaling1   | Pyrosequencing    | 9.5                       | 18 (19.6)                                           |
| RUNX3                                                     | 1p36.11       | Runt-related transcription factor 3 | Pyrosequencing    | 8.9                       | 20 (21.3)                                           |
| Type-A genes (genes methylated in both normal and cancer) |               |                                     |                   |                           |                                                     |
| ER alpha                                                  | 6q25.1        | Estrogen receptor                   | Pyrosequencing    | 34.1                      | 84 (87.5)                                           |
| MyoD1                                                     | 11p15.4       | Muscle cell differentiation         | Pyrosequencing    | 39.6                      | 86 (92.5)                                           |
| N33                                                       | 8p22          | Oligo-saccharyl-transferase         | Pyrosequencing    | 42.4                      | 88 (96.7)                                           |
| SFRP1                                                     | 8p12          | Secreted frizzled-related protein 1 | Pyrosequencing    | 52.7                      | 92 (98.9)                                           |
| HPP1                                                      | 2q32.3        | Transmembrane receptor              | Pyrosequencing    | 35.1                      | 76 (87.4)                                           |
| Genetic                                                   |               |                                     |                   |                           |                                                     |
| Genetic Alterations                                       |               |                                     |                   |                           |                                                     |
| BRAF mutant                                               | 7q34          | serine/threonine-protein kinase     | Pyrosequencing    |                           | 11 (12.6)                                           |
| KRAS mutant                                               | 12p12.1       | small GTPase superfamily            | MASA*             |                           | 43 (45.7)                                           |
| P53 mutant                                                | 17p13.1       | Nuclear protein, cell cycle         | SSCP <sup>#</sup> |                           | 44 (47.3)                                           |

| Marker | Chr. location | Function                        | Methylation assay | Mean Methylation level, % | Cases with methylation $\geq 15\%$ , % of total cases |
|--------|---------------|---------------------------------|-------------------|---------------------------|-------------------------------------------------------|
| MSI-H  |               | Microsatellite instability-High |                   |                           | 22 (22.7)                                             |

Chr., Chromosome. \*, MASA: mutant allele-specific PCR amplification; #, SSCP: single-strand conformation polymorphism
