# Supplementary material
Source: PubMed Central journal article supplement (PMC2141832)
Supplement: pnas_0704652104_3.pdf [file pnas_0704652104_3.pdf]

**Table 7. Summary statistics of gene methylation among clusters by Kruskal-Wallis Tests and ANOVA**

| Marker                                    | Cluster 1 Mean (SD) | Cluster 2 Mean (SD) | Cluster 3 Mean (SD) | P value |
|-------------------------------------------|---------------------|---------------------|---------------------|---------|
| Original markers (MINT clones)            |                     |                     |                     |         |
| MINT1                                     | 0.43 (0.18)         | 0.01 (0.08)         | 0.24 (0.25)         | <0.0001 |
| MINT2                                     | 0.39 (0.21)         | 0.03 (0.11)         | 0.31 (0.25)         | <0.0001 |
| MINT27                                    | 0.43 (0.18)         | 0.04 (0.14)         | 0.39 (0.21)         | <0.0001 |
| MINT12                                    | 0.39 (0.21)         | 0.03 (0.11)         | 0.22 (0.25)         | <0.0001 |
| MINT31                                    | 0.39 (0.21)         | 0.03 (0.11)         | 0.27 (0.25)         | <0.0001 |
| MINT17                                    | 0.36 (0.23)         | 0.01 (0.08)         | 0.15 (0.23)         | <0.0001 |
| Type-C genes (Genes methylated in cancer) |                     |                     |                     |         |
| P14/ARF                                   | 0.18 (0.18)         | 0.02 (0.05)         | 0.07 (0.12)         | 0.006   |
| MLH1                                      | 0.39 (0.21)         | 0.00 (0.00)         | 0.00 (0.00)         | <0.0001 |
| THBS1                                     | 0.05 (0.12)         | 0.00 (0.00)         | 0.02 (0.07)         | 0.003   |
| THBS2                                     | 0.21 (0.13)         | 0.07 (0.07)         | 0.12 (0.11)         | <0.0001 |
| MGMT                                      | 0.29 (0.26)         | 0.12 (0.18)         | 0.25 (0.27)         | 0.005   |
| COX2                                      | 0.03 (0.09)         | 0.02 (0.07)         | 0.05 (0.10)         | 0.69    |
| Megalin                                   | 0.16 (0.16)         | 0.05 (0.10)         | 0.14 (0.17)         | 0.004   |
| RIZ1                                      | 0.27 (0.30)         | 0.02 (0.06)         | 0.02 (0.07)         | <0.0001 |
| P16 (CDKN2A)                              | 0.20 (0.15)         | 0.03 (0.02)         | 0.14 (0.18)         | <0.0001 |
| RASSF1A                                   | 0.11 (0.16)         | 0.06 (0.09)         | 0.09 (0.14)         | 0.21    |
| DAPK                                      | 0.05 (0.08)         | 0.03 (0.04)         | 0.07 (0.08)         | 0.12    |
| TIMP3                                     | 0.41 (0.23)         | 0.06 (0.11)         | 0.14 (0.20)         | <0.0001 |

| Marker                                                    | Cluster 1 Mean (SD) | Cluster 2 Mean (SD) | Cluster 3 Mean (SD) | P value |
|-----------------------------------------------------------|---------------------|---------------------|---------------------|---------|
| hTERT                                                     | 0.15 (0.13)         | 0.07 (0.13)         | 0.18 (0.19)         | 0.003   |
| Neurog1                                                   | 0.45 (0.27)         | 0.10 (0.15)         | 0.29 (0.22)         | <0.0001 |
| SOCS1                                                     | 0.22 (0.17)         | 0.07 (0.10)         | 0.05 (0.09)         | 0.0007  |
| RUNX3                                                     | 0.21 (0.20)         | 0.03 (0.04)         | 0.08 (0.12)         | 0.0002  |
| Type-A genes (Genes methylated in both normal and cancer) |                     |                     |                     |         |
| ER alpha                                                  | 0.33 (0.18)         | 0.31 (0.14)         | 0.38 (0.14)         | 0.22    |
| MyoD1                                                     | 0.37 (0.20)         | 0.35 (0.19)         | 0.46 (0.13)         | 0.03    |
| N33                                                       | 0.39 (0.14)         | 0.41 (0.14)         | 0.46 (0.11)         | 0.26    |
| SFRP1                                                     | 0.48 (0.16)         | 0.54 (0.14)         | 0.54 (0.14)         | 0.37    |
| HPPI                                                      | 0.34 (0.20)         | 0.33 (0.17)         | 0.38 (0.13)         | 0.40    |
