# Supplementary material
Source: PubMed Central journal article supplement (PMC2141832)
Supplement: pnas_0704652104_4.pdf [file pnas_0704652104_4.pdf]

**Table 8. Summary of the PCR and sequencing primers for DNA methylation analysis**

| Region | Primer sequences and annealing temperature                                                                                                                         | Product length, bp | Sequencing primers       | CpGs, no. | Sequence length |
|--------|--------------------------------------------------------------------------------------------------------------------------------------------------------------------|--------------------|--------------------------|-----------|-----------------|
| P16    | Forward<br>GGYGGGAGTAGTATGGAGTTTT<br>Reverse (5'-Biotin)<br>ACAAACCCTCTACCCACCTAAA<br>58/56/54/52°C                                                                | 175                | GGTTGATTGGTTGGTTA        | 5         | 21              |
| RUNX3  | Forward<br>GGGTATTTTTATTTTTATTGT<br>Reverse-Universal<br>GGGACACCGCTGATCGTTTAACAACCCCAACTTCCTCTA<br>Universal (5'-Biotin)<br>GGGACACCGCTGATCGTTTA<br>58/56/54/52°C | 195                | GTATTTATTTTGAAGG         | 3         | 16              |
| TIMP3  | Forward<br>TTTTGGTTTGGGTTAGAGATAT<br>Reverse-Universal<br>GGGACACCGCTGATCGTTTACCCCTCAAACCAATAAC<br>Universal (5'-Biotin)                                           | 296                | ATTTTTTATAAGGATTTG<br>AA | 6         | 40              |

| Region  | Primer sequences and annealing temperature           | Product length, bp | Sequencing primers      | CpGs, no. | Sequence length |
|---------|------------------------------------------------------|--------------------|-------------------------|-----------|-----------------|
|         | <a href="#">GGGACACCGCTGATCGTTTA</a>                 |                    |                         |           |                 |
|         | 58/56/54/52°C                                        |                    |                         |           |                 |
| RASSF1A | Forward                                              | 298                | Seq1:                   |           |                 |
|         | GGGGGAGTTTGAGTTTATTGA                                |                    | GGGTAGTATTAGGTTGGA<br>G | 5         | 21              |
|         | Reverse (5'-Biotin)                                  |                    | Seq2:                   |           |                 |
|         | CTACCCCTTAACCTACCCCTTCC                              |                    | GATTTTATTGGGG           |           |                 |
|         | 55°C                                                 |                    |                         | 3         | 9               |
| DAPK    | Forward                                              |                    | Seq1:                   |           |                 |
|         | GGAGTGTGAGGAGGATAGT                                  | 355                | TTTTTAGTTGTGTTTT        | 6         | 27              |
|         | Reverse (5'-Biotin)                                  |                    | Seq2:                   |           |                 |
|         | CCTTAACCTTCCCAATTACT                                 |                    | GGGGGAGTTTTTAGG         | 4         | 23              |
|         | 55°C                                                 |                    |                         |           |                 |
| hTERT   | Forward                                              | 167                | TGGGAAGTTTTGGTTT        | 6         | 24              |
|         | TGTTGYGTAYGTGGGAAGTTT                                |                    |                         |           |                 |
|         | Reverse-Universal                                    |                    |                         |           |                 |
|         | <a href="#">GGGACACCGCTGATCGTTTAAACCCTAAACCCCAAC</a> |                    |                         |           |                 |
|         | Universal (5'-Biotin)                                |                    |                         |           |                 |
|         | <a href="#">GGGACACCGCTGATCGTTTA</a>                 |                    |                         |           |                 |
|         | 58/56/54/52°C                                        |                    |                         |           |                 |
| ER      | Forward                                              | 125                | GGATACGGTTTGTATTTT<br>G | 3         | 13              |

| Region | Primer sequences and annealing temperature           | Product length, bp | Sequencing primers      | CpGs, no. | Sequence length |
|--------|------------------------------------------------------|--------------------|-------------------------|-----------|-----------------|
|        | TGTGTTTTTTTTTAGGTGG                                  |                    |                         |           |                 |
|        | Reverse (5'-Biotin)                                  |                    |                         |           |                 |
|        | AACCATCCCAAATACTTAATA                                |                    |                         |           |                 |
|        | 58/56/54/52°C                                        |                    |                         |           |                 |
| MyoD1  | Forward                                              | 160                | GAGGTTTGGAAAGGG         | 2         | 10              |
|        | AATTAGGGGATAGAGGAGTATTGAAAG                          |                    |                         |           |                 |
|        | Reverse-Universal                                    |                    | GAAAGTTAGTTAGAGGT<br>GA | 6         | 27              |
|        | GACGGACACCCGCTGATCGTTTAAACAACCCTAAACRACACT<br>TAACTC |                    |                         |           |                 |
|        | Universal (5'-Biotin)                                |                    |                         |           |                 |
|        | GGGACACCCGCTGATCGTTTA                                |                    |                         |           |                 |
|        | 58/56/54/52°C                                        |                    |                         |           |                 |
| SFRP1  | Forward                                              | 218                | GTTTGGTTTTAGTAAAT       | 5         | 23              |
|        | TGTTTTTTAAGGGGTGTTGA                                 |                    |                         |           |                 |
|        | Reverse-Universal                                    |                    |                         |           |                 |
|        | GGGACACCCGCTGATCGTTTACTCCRAAAACTACAAA AACTAAAAT      |                    |                         |           |                 |
|        | Universal (5'-Biotin)                                |                    |                         |           |                 |
|        | GGGACACCCGCTGATCGTTTA                                |                    |                         |           |                 |
|        | 58/56/54/52°C                                        |                    |                         |           |                 |
| N33    | GYGYGTGGAGGAGATATTGTTT                               | 195                | GGAGGAGATATTGTTTTG<br>T | 6         | 33              |

| Region           | Primer sequences and annealing temperature          | Product length, bp | Sequencing primers     | CpGs, no.                                       | Sequence length |
|------------------|-----------------------------------------------------|--------------------|------------------------|-------------------------------------------------|-----------------|
|                  | GACGGGACACCGCTGATCGTTTACATTCTACCTCCCTTTTCTTCT<br>AT |                    |                        |                                                 |                 |
|                  | Universal (5'-Biotin)                               |                    |                        |                                                 |                 |
|                  | GGGACACCGCTGATCGTTA                                 |                    |                        |                                                 |                 |
|                  | 58/56/54/52°C                                       |                    |                        |                                                 |                 |
| HPP1             | Forward                                             | 175                | GGGATGTTTAGTAGTT       | 4                                               | 18              |
|                  | TGTTTTTYGTYGGGTGTTATTGTTAT                          |                    |                        |                                                 |                 |
|                  | Reverse-Universal                                   |                    |                        |                                                 |                 |
|                  | GACGGGACACCGCTGATCGTTTATCCACACACACCAATAACTAAT       |                    |                        |                                                 |                 |
|                  | TC                                                  |                    |                        |                                                 |                 |
|                  | Universal (5'-Biotin)                               |                    |                        |                                                 |                 |
|                  | GGGACACCGCTGATCGTTA                                 |                    |                        |                                                 |                 |
|                  | 58/56/54/52°C                                       |                    |                        |                                                 |                 |
| BRAF-<br>exon 11 | Forward                                             |                    |                        |                                                 |                 |
|                  | GGCTTGACTTGACTTTTTTACTGT                            | 192                | TACAGTGGGACAAAGAA<br>T | TGG/A[TC]ATCTGG/C[<br>AT]ATCATTG/C[AT]G<br>AACA |                 |
|                  | Reverse-Universal                                   |                    |                        |                                                 |                 |
|                  | GGGACACCGCTGATCGTTTACATTACATACTTACCATGCCACTT        |                    |                        |                                                 |                 |
|                  | Universal (5'-Biotin)                               |                    |                        |                                                 |                 |
|                  | GGGACACCGCTGATCGTTA                                 |                    |                        |                                                 |                 |

| Region      | Primer sequences and annealing temperature    | Product length, bp | Sequencing primers              | CpGs, no.                                                   | Sequence length |
|-------------|-----------------------------------------------|--------------------|---------------------------------|-------------------------------------------------------------|-----------------|
|             | 55°C                                          |                    |                                 |                                                             |                 |
| BRAF-exon15 | Forward (5'-Biotin)<br>GCTTGCTCTGATAGGAAAATGA | 156                | Seq1:<br>ATTTTACTGTGAGGTCT<br>T | Analyze1:<br>T/CATGAAGAAAATATA<br>TCTG                      |                 |
|             | Reverse<br>GACAACTGTTCAAACCTGATGGG            |                    | Seq2:<br>CCACTCCATCGAGATTT      | Analyze 2:<br>A/CT/ACTGTAGCTC/A<br>C/GACG/CC/AAAATCA<br>CCT |                 |
