# Supplementary material
Source: PubMed Central journal article supplement (PMC2141832)

agreement score

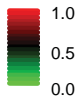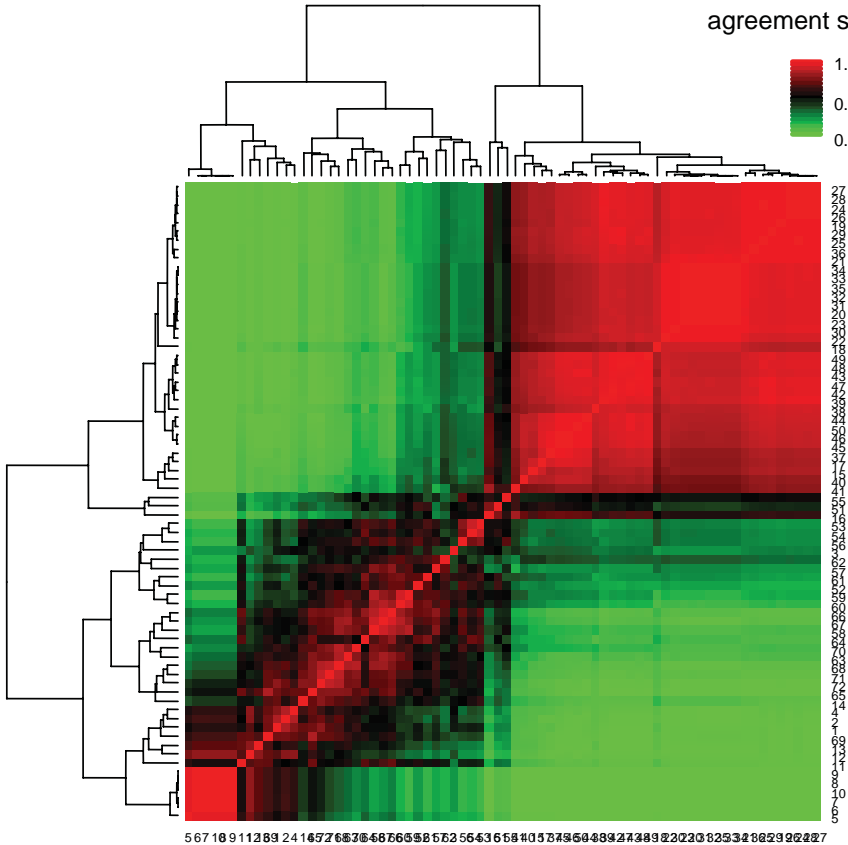

Supplement: pnas_0704652104_1.pdf [file pnas_0704652104_1.pdf]
